# Supplementary material
Source: publisher site journal article supplement (https://www.dovepress.com/get_supplementary_file.php?f=381353.docx)
Supplement: Supplementary file 1 [file get_supplementary_file.php]

| Formulae | Zero order | First order | Diffusion |
| --- | --- | --- | --- |
| R2 | R2 | R2 |
| TBLs1 | 0.9787 | 0.8976 | 0.99929 |
| TBLs 2 | 0.9782 | 0.8984 | 0.99928 |
| TBLs 3 | 0.9721 | 0.8537 | 0.99918 |
| TBLs 4 | 0.9917 | 0.8740 | 0.99911 |
| TBLs 5 | 0.9832 | 0.8841 | 0.99241 |
| TBLs 6 | 0.9792 | 0.8887 | 0.99932 |
| TBLs 7 | 0.9783 | 0.8938 | 0.9968 |
| TBLs 8 | 0.9848 | 0.9111 | 0.99776 |
| TBLs 9 | 0.9939 | 0.8950 | 0.99302 |
| TBLs 10 | 0.9808 | 0.8998 | 0.99912 |
| TBLs 11 | 0.9864 | 0.9227 | 0.99460 |
| TBLs 12 | 0.9971 | 0.9302 | 0.98777 |
| TBLs 13 | 0.9932 | 0.9288 | 0.99418 |
| TBLs 14 | 0.9820 | 0.9098 | 0.99819 |
| TBLs 15 | 0.9826 | 0.9115 | 0.99543 |

Supplementary Table 1 [Drug Release Kinetics of CIT Formula


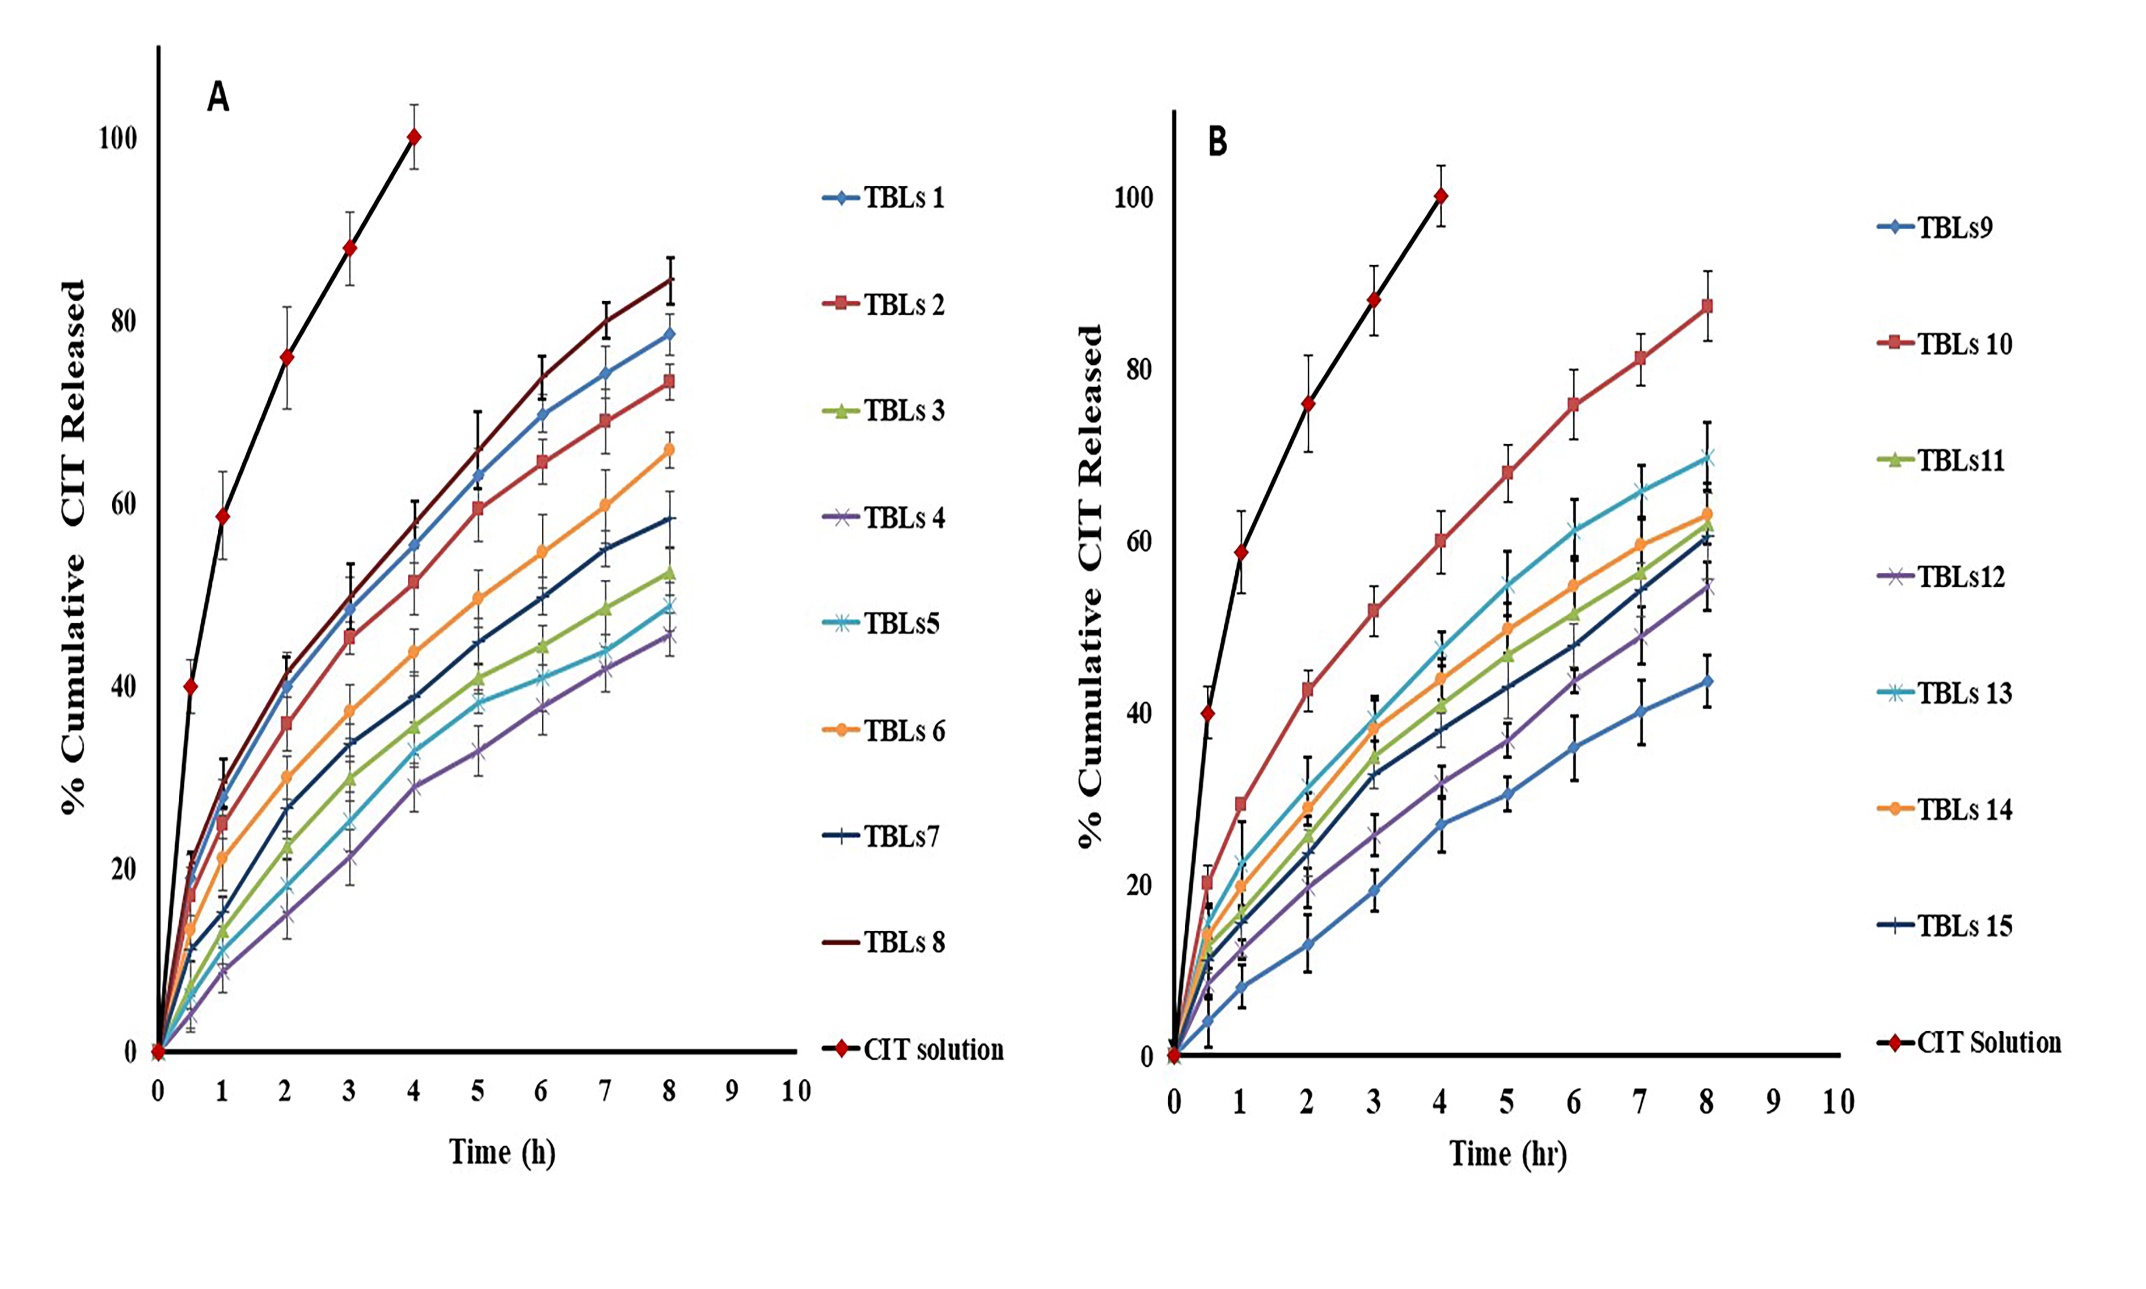


Supplementary Figure 1 [ *In -vitro* release profile of CIT from drug solution and different TBLs formula: (A) TBLs 1 –TBLs 8,


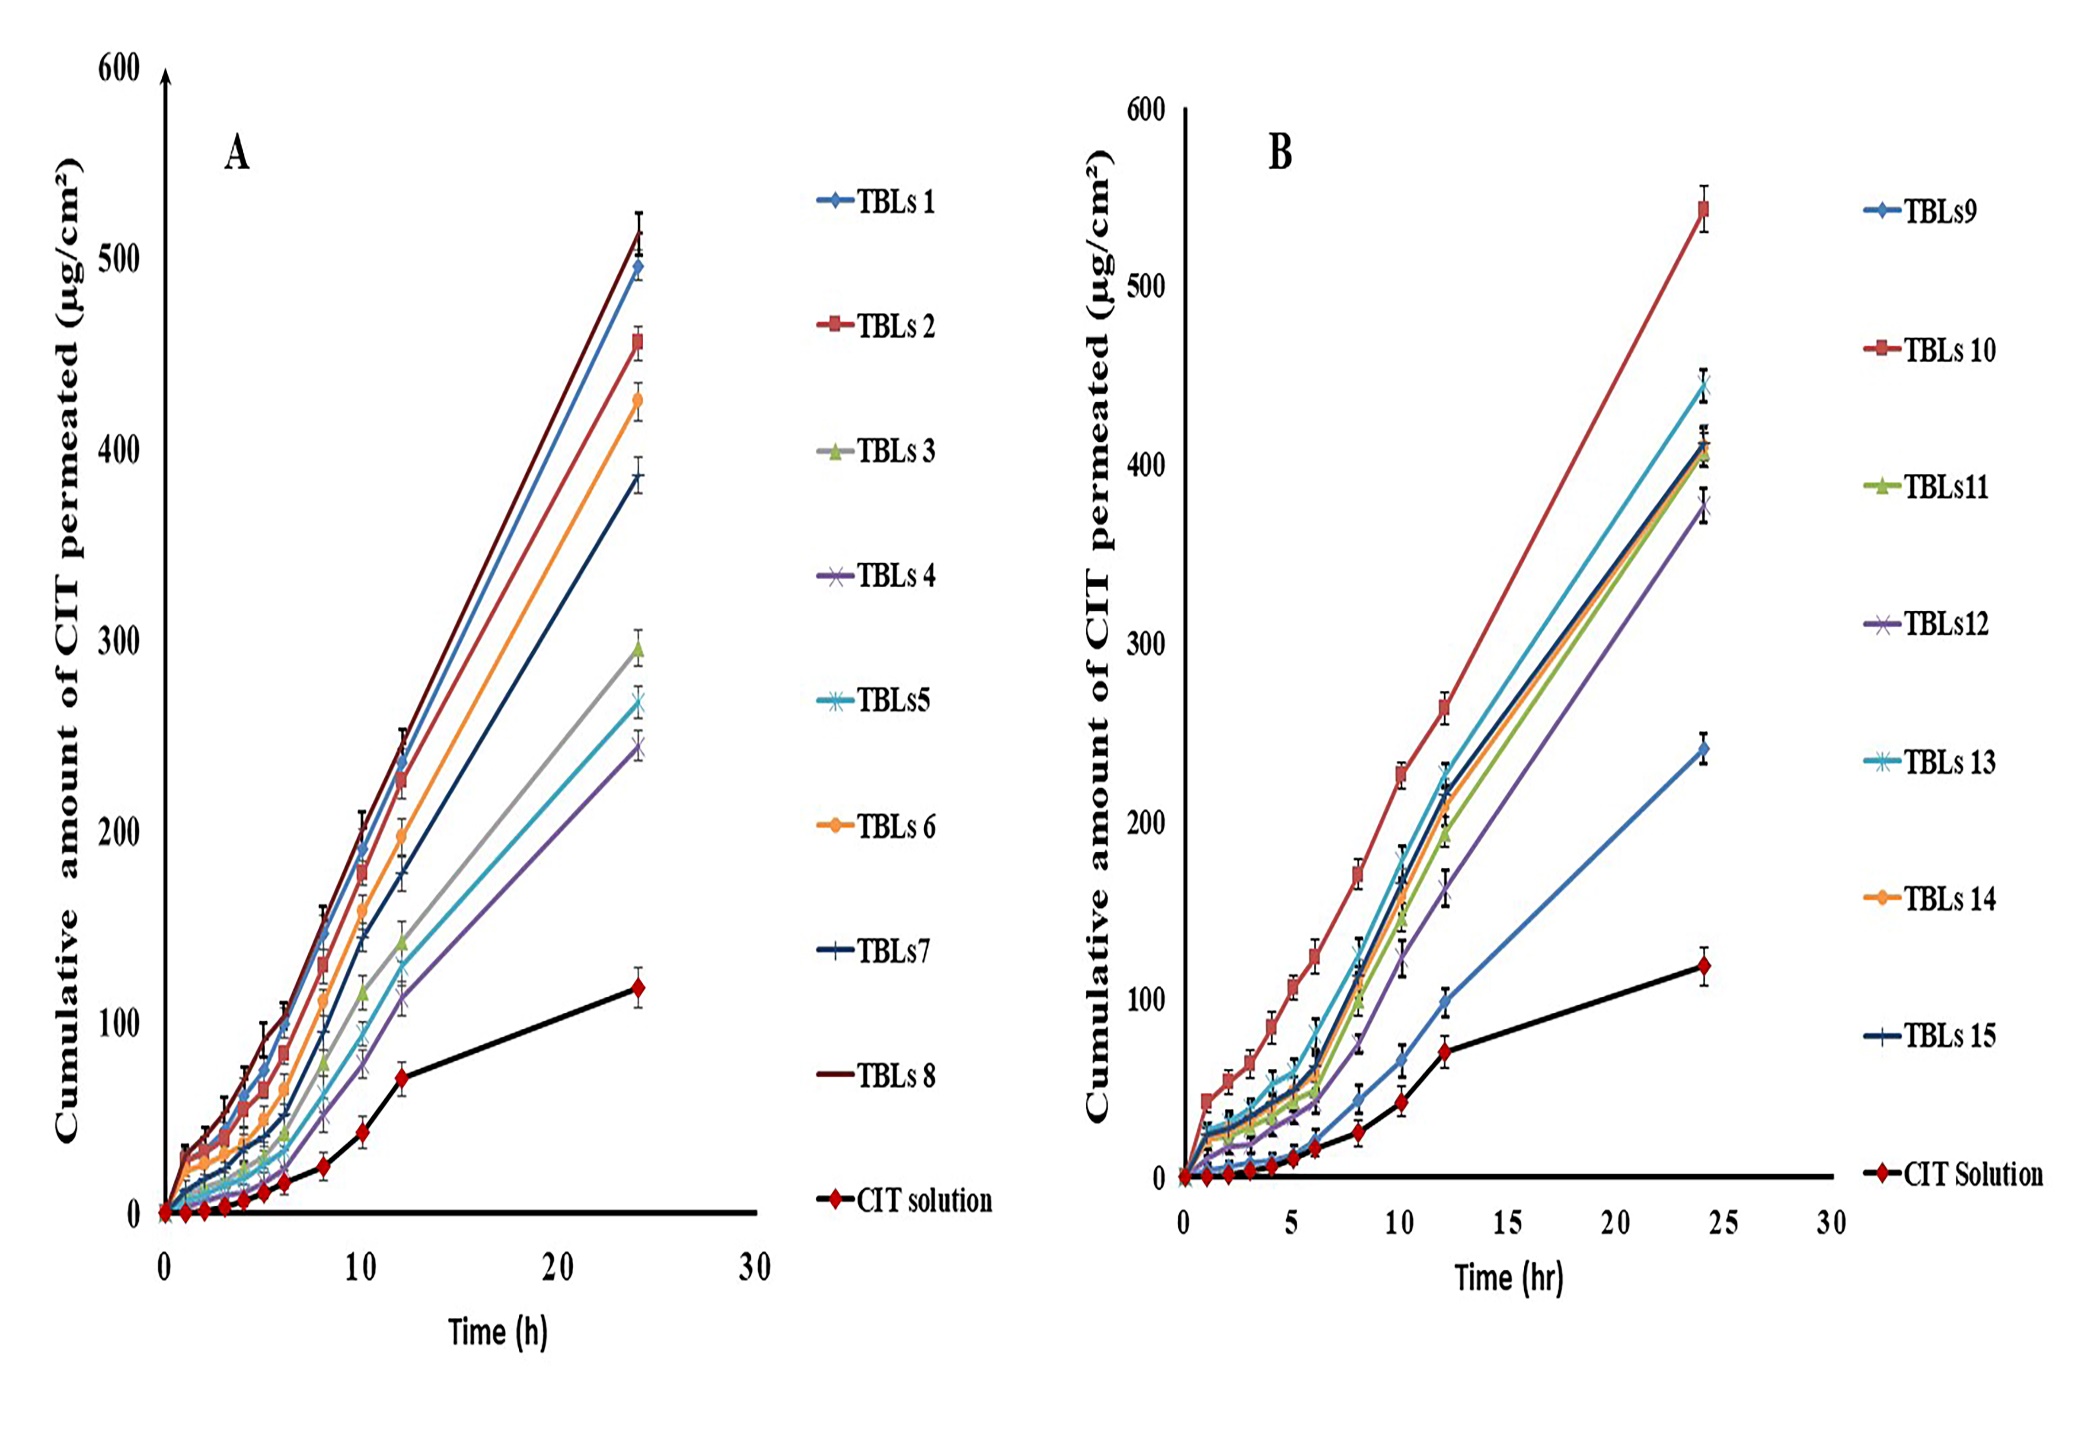
(B) TBLs 9 –TBLs 15]

Supplementary Figure 2[Permeation profile of CIT from drug solution and different TBLs formula: (A) TBLs 1–TBLs7, (B) TBsL8- BLs15]


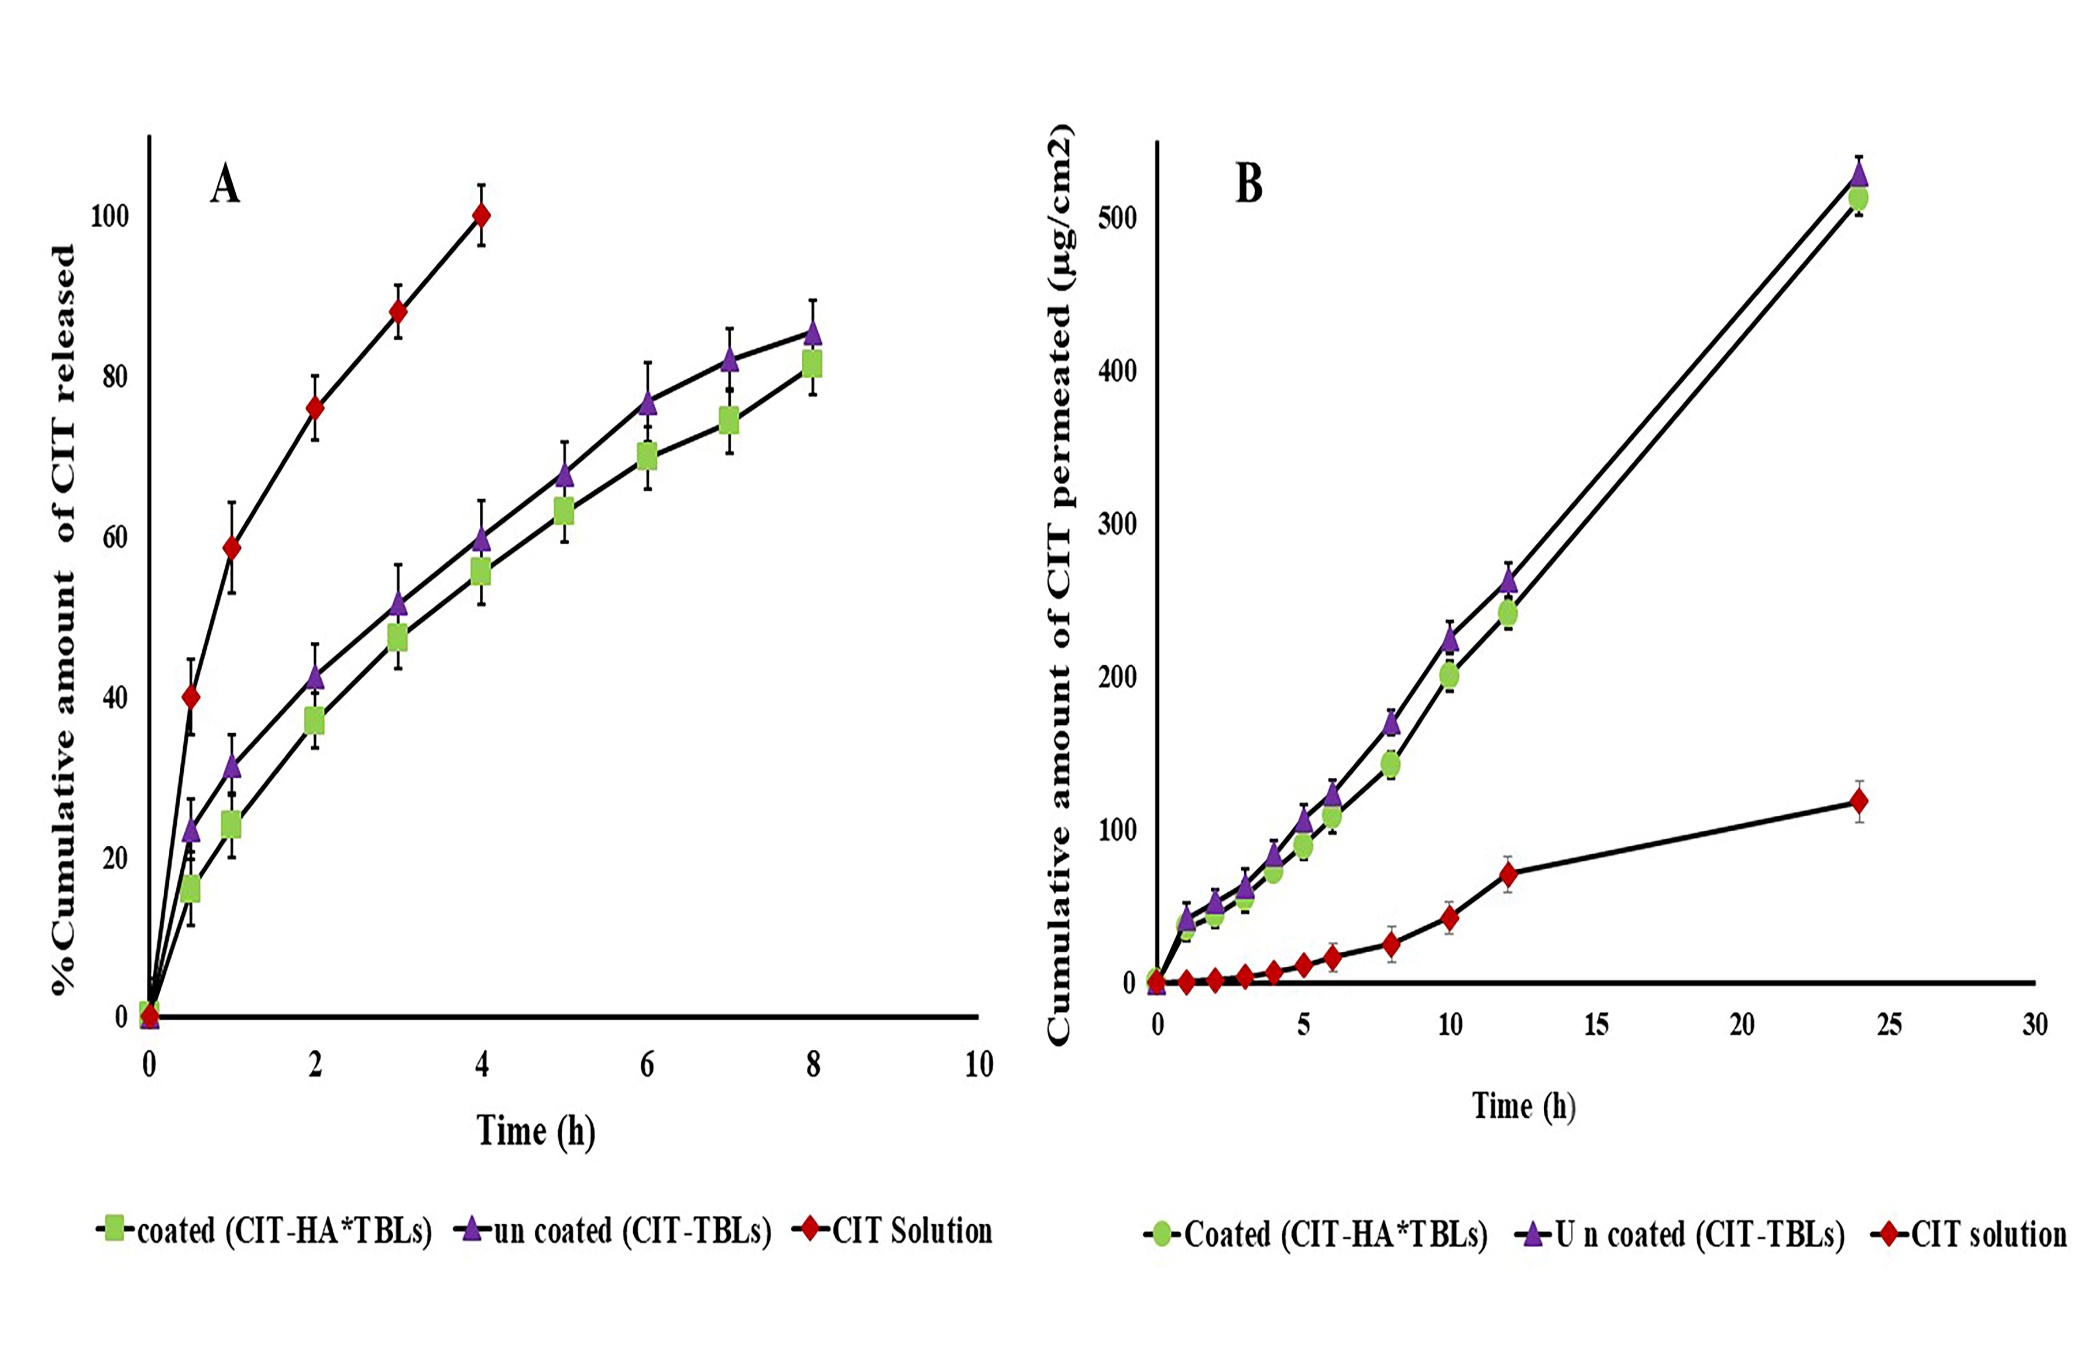


Supplementary Figure 3 [Dissolution profiles (A) and permeation profiles (B) of CIT from the un coated CIT-TBLs and

Coated CIT-HA*TBLs
